1 **Dynamic neurogenomic responses to social interactions and**  
2 **dominance outcomes in female paper wasps**

3

4

5

6 Floria M.K. Uy<sup>a</sup>, Christopher M. Jernigan, Natalie C. Zaba, Eshan Mehrotra, Sara E. Miller,  
7 Michael J. Sheehan\*

8

9 Laboratory for Animal Social Evolution and Recognition

10 Department of Neurobiology and Behavior

11 Cornell University

12 Ithaca, NY 14853

13

14 \* Corresponding author: [msheehan@cornell.edu](mailto:msheehan@cornell.edu)

15 <sup>a</sup> Present address: Department of Biology, University of Rochester, Rochester, NY 14627

16

17 **ABSTRACT**

18

19 Social interactions have large effects on individual physiology and fitness. In the immediate  
20 sense, social stimuli are often highly salient and engaging. Over longer time scales, competitive  
21 interactions often lead to distinct social ranks and differences in physiology and behavior.

22 Understanding how initial responses lead to longer-term effects of social interactions requires  
23 examining the changes in responses over time. Here we examined the effects of social  
24 interactions on transcriptomic signatures at two points, at the end of a 45-minute interaction and  
25 4 hours later, in female *Polistes fuscatus* paper wasp foundresses. Female *P. fuscatus* have  
26 variable facial patterns that are used for visual individual recognition, so we separately  
27 examined the transcriptional dynamics in the optic lobe and the central brain. Results  
28 demonstrate much stronger transcriptional responses to social interactions in the central brain  
29 compared to the optic lobe. Differentially regulated genes in response to social interactions are  
30 enriched for memory-related transcripts. Comparisons between winners and losers of the  
31 encounters revealed similar overall transcriptional profiles at the end of an interaction, which  
32 significantly diverged over the course of 4 hours, with losers showing changes in expression  
33 levels of genes associated with aggression and reproduction in paper wasps. On nests,  
34 subordinate foundresses are less aggressive, do more foraging and lay fewer eggs compared to  
35 dominant foundresses and we find losers shift expression of many genes, including vitellogenin,  
36 related to aggression, worker behavior, and reproduction within hours of losing an encounter.  
37 These results highlight the early neurogenomic changes that likely contribute to behavioral and  
38 physiological effects of social status changes in a social insect.

39

40 **Keywords**

41 dominance, sociobiology, social insect, winner-loser effects, individual face recognition, learning  
42 and memory

## 43 INTRODUCTION

44

45 Social interactions can give rise to a range of immediate as well as long-lasting effects on  
46 behavior and physiology<sup>1-4</sup>. Regardless of the nature of the interaction or the outcome, social  
47 experiences are expected to have a number of shared effects on the physiology of those  
48 involved. Processing social information may depend on multiple cues or signals, which may be  
49 processed by generalized or social-specific cognitive mechanisms<sup>5</sup>. In addition to social  
50 information processing, interactions can increase rates of activity and movement, especially in  
51 relation to courting or fighting<sup>2,6</sup>. Longer-term consequences of social interactions depend on the  
52 nature and outcome of the encounters. Cooperative interactions can lead to benefits for multiple  
53 individuals as well as physiological responses that aid in reinforcing social bonds. Competitive  
54 interactions, in contrast, often lead to divergent outcomes for individuals –i.e., a winner and  
55 loser. Winning versus losing typically cause different physiological and behavioral responses<sup>7-</sup>  
56 <sup>13</sup>. Over repeated interactions, this can lead to profound differences in behavior, physiology, life  
57 expectancy, and fitness<sup>4,14-17</sup>.

58

59 How are social outcomes translated into physiological changes? Ultimately, the answer to this  
60 question lies at the intersection of the neural circuits that process information as well as the  
61 resulting neurogenomic shifts, i.e., the changes in patterns of brain gene expression, that  
62 accompany social challenges. In recent years there has been a growing number of gene  
63 expression studies examining the neurogenomic responses to social interactions across a range  
64 of taxa including honeybees, mice and sticklebacks<sup>6,18,19</sup>. In a broad sense, social interactions  
65 are expected to engage similar brain circuits across individuals. For example, in vertebrates  
66 these brain regions have largely been conserved across 450 million years of evolution<sup>20</sup>.  
67 Indeed, at the level of neural firing patterns, social interactions give rise to similar patterns of  
68 neural activity in bats and mice<sup>21,22</sup>. While a similar network has not been identified across  
69 insects, we might reasonably expect members of the same species to engage similar brain  
70 regions and likely have similar initial neurogenomic responses to social interactions as well.

71

72 Divergent social outcomes lead to different physiological responses, which may be initiated by  
73 differences in neurogenomic responses shortly following an interaction. There have also been  
74 studies examining the effects of winning and losing rather than simply the response to challenge  
75 *per se*. In zebrafish, socially driven transcriptional changes require individuals to assess the  
76 outcome of the interaction<sup>23</sup> (i.e., did they win or lose). In sub-social carpenter bees, repeatedly  
77 winning or losing staged contests gives rise to distinct neurogenomic profiles<sup>11,24</sup>. In the ant  
78 *Harpegnathos saltator*, workers compete for reproductive openings upon the removal of the  
79 queen and within a few days individuals have divergent neurogenomic profiles depending on  
80 their trajectory toward either staying as a worker or becoming a reproductive gamergate<sup>25</sup>.  
81 Similar divergence in social behavior and neurogenomic profiles are seen among *Polistes*  
82 *dominula* paper wasp workers upon queen removal<sup>26,27</sup>. Collectively, these studies demonstrate  
83 that social interactions can have immediate effects and that repeated interactions can have  
84 longer-term consequences for patterns of transcription in the brain that differ for winners and  
85 losers or higher- versus lower-ranking individuals. Understanding how transcriptional patterns  
86 change over time in response to different social interactions and across different taxa will help  
87 us to more clearly link social outcomes to short and long-term physiological changes.

88

89 Understanding the dynamic changes that occur between initial responses and subsequent  
90 divergence between winners and losers will help link these two areas of research. Studies  
91 examining the temporal dynamics of transcriptional responses to social challenge in stickleback  
92 and mice over the course of a few hours<sup>18,19</sup> highlight the transient and dynamic nature of  
93 transcriptional responses. Detailed work on the early transcriptional responses to fighting

94 between pairs of male beta fish demonstrates that fighting individuals have shared  
95 transcriptomic responses within the first hour after fighting<sup>28</sup>. Though the studies mentioned  
96 above have looked at dynamic responses to a social challenge from territorial or nest intrusions  
97 or more established winner-loser effects, the dynamics by which interacting individuals develop  
98 divergent transcriptomic responses over the course of a few hours has received less attention.  
99

100 Here we examine the dynamic neurogenomic responses to social interactions in female *Polistes*  
101 *fuscatus* paper wasp foundresses over the course of four hours following a staged social  
102 interaction. Paper wasps are primitively eusocial insects in which females found new nests each  
103 spring after overwintering<sup>29</sup>. Social interactions among paper wasp foundresses lead to  
104 profound physiological differences between dominants and subordinates. Nests are initiated by  
105 a single foundress or small groups of foundresses, who form an aggression-based dominance  
106 hierarchy, which determines the extent of work and egg-laying<sup>30,31</sup>. Polistine foundresses have  
107 aggressive interactions in both the pre-nesting stage as well as on the nests, where they  
108 interact aggressively with co-foundresses as well as occasional usurpers<sup>32-35</sup>. Wasps also  
109 reliably show aggression to other individuals in neutral arenas, providing a convenient method  
110 for studying the effects of aggression in a controlled setting<sup>36-38</sup>. Previous work has shown that  
111 *Polistes* foundresses respond rapidly to aggressive encounters by modulating juvenile  
112 hormone<sup>13</sup>, though genome-wide transcriptomic responses have yet to be examined  
113 immediately following aggressive interactions. In established co-foundress associations,  
114 dominant and subordinate foundresses show differential expression of genes associated with  
115 aggressive behavior<sup>39</sup>. By comparing the temporal shifts in gene expression between winners  
116 and losers, we can potentially identify genes that are associated with the early stages of  
117 dominance hierarchy formation in paper wasps, as well as generate more general insights into  
118 the neurogenomic processes by which social interactions lead to divergence in behavior and  
119 physiology.

120  
121 The neurogenomic responses to social interactions in *P. fuscatus* are also of interest because  
122 this species recognizes individuals based on variable facial features<sup>5,40</sup>. Individual recognition  
123 appears to mediate dominance interactions among groups in the lab and on natural nests<sup>37,40</sup>.  
124 Individual recognition is not present in other closely related species of paper wasps<sup>5,41</sup>,  
125 suggesting the trait has evolved relatively recently<sup>42</sup>. Neurogenomic responses to operant  
126 conditioning related to face-learning have been previously studied<sup>43</sup>, but their neurogenomic  
127 responses to social interactions have not been investigated. Wasps are known to form long-  
128 term memories of those they have interacted with<sup>44</sup>, so examination of neural transcriptomes a  
129 few hours after the interaction has the potential to reveal insights into the neurogenomic  
130 responses related to social memory, as long-term memory formation occurs hours after initial  
131 learning has occurred<sup>45</sup>. Given the importance of vision in social interactions for this species, we  
132 examined the effects of social interaction on the optic lobe as well as the central brain (Fig 1a,  
133 hereafter 'optic lobe' and 'brain').

134  
135 We designed an experiment to examine the dynamic neurogenomic responses shortly after  
136 social interactions in the optic lobe and non-visual brain (Fig 1a). Wasps were filmed in a neutral  
137 arena while paired with another weight-matched individual or alone. To better understand the  
138 temporal dynamics of neurogenomic responses in the hours following a social interaction, we  
139 looked at transcriptomes at two time points: immediately following a 45-minute interaction and  
140 after 4 hours of separation back in the wasps' original housing containers (Fig 1a). In the  
141 grander scheme of paper wasp dominance relationships, both of these timepoints are very early  
142 in the time course over which a dominance hierarchy would be formed. For ease of  
143 distinguishing between the samples we refer to those taken immediately at the end of a 45-  
144 minute interaction as 'early' and those at 4 hours as 'late'.

145  
146 Using the RNAseq data from paper wasp foundresses, we address multiple questions. (1) How  
147 does the magnitude of neurogenomic responses differ between peripheral and central  
148 processing? To the extent that responses are driven by the processing of social outcomes  
149 rather than simply response to social stimuli, we may expect larger and or more dynamic  
150 changes in more central compared to peripheral brain regions. (2) Given that paper wasps learn  
151 and remember the identities of wasps they interact with<sup>44</sup>, is there a detectable neurogenomic  
152 signature related to memory in paper wasps following interactions? (3) How does social  
153 outcome influence the dynamics of neurogenomic responses over the course of a few hours?  
154 Recent studies suggest similar neural responses among individual during or right after social  
155 interactions<sup>21,22,28</sup>, whereas others demonstrate divergent outcomes over the course of  
156 days<sup>11,24,25,27</sup>. Therefore, we may predict that initial neurogenomic responses will be more similar  
157 immediately following social interactions and that winners and losers will diverge  
158 transcriptionally over time.

## 159 160 **RESULTS AND DISCUSSION**

### 161 162 **Social interactions generate stronger and more dynamic neurogenomic responses in the** 163 **central brain compared to optic lobe**

164 We first compared RNAseq data from 139 samples in DESeq2 with a model that included tissue  
165 (optic lobe or central brain), whether or not wasps had been placed in a social or control trial,  
166 and time of sacrifice as separate categorical main factors. Optic lobes and the brain show  
167 distinct transcriptional profiles that are well-separated in a PCA (Fig 1c). We identified 4937  
168 differentially expressed genes (DEGs) between the brain and optic lobes consistent with  
169 different cellular compositions between the two tissues. Time of sacrifice showed a minor effect  
170 on overall patterns of gene expression with 73 DEGs. In contrast, social experience had a more  
171 pronounced effect on patterns of gene expression, with 742 DEGs (Fig S1). Furthermore, social  
172 and non-social samples are better separated in principal component space among brain  
173 samples compared to optic lobe (Fig 1b). Though social and nonsocial central brain samples  
174 are differentiated along PC2 (ANOVA,  $F_{1,64} = 4.75$ ,  $P = 0.033$ ), the groups do not form two  
175 distinct clusters as has been found in other transcriptomic studies related to social behavior in  
176 other species (e.g. Vu et al. 2020). The behavioral paradigm used in this study mirrors other lab  
177 studies of social behavior and cognition in *P. fuscatus* that examined encounters in a neutral  
178 arena and detect variable amounts of aggression<sup>41,44,46</sup>, though is likely to be a less extreme  
179 social experience compared to paradigms that challenge individuals in their nest or home cage  
180 and or otherwise produce strong fighting responses used in other behavioral transcriptomic  
181 studies<sup>6,18,19,28</sup>. Although the social experiences in our trials were comparatively mild, we  
182 nevertheless detect hundreds of differentially expressed genes in response to social  
183 interactions.

184  
185 We next considered a model comparing each group based on brain region, time and social  
186 experience as a single combined factor (e.g., brain\_early\_social v. brain\_early\_nonsocial).  
187 Consistent with visual separation in the PCA (Fig 1b), the comparisons reveal a stronger effect  
188 of social interactions on the brain compared to the optic lobe (Fig 2a). The results are  
189 qualitatively similar when examining the effects of social experience and time on brain and optic  
190 datasets separately (Fig 2b-c, Table S2).

191  
192 These data add to a growing body of literature documenting the changes in brain transcriptomic  
193 profiles in response to social behavior<sup>2,6,11,19,24,28</sup>. Consistent with those studies, we find  
194 hundreds of genes that are differentially regulated in some comparisons. The neurogenomic  
195 effects of social interaction are detectable at both the earlier (at the end of a 45-minute

196 interaction) and later (4 hours following the interaction) time points, but the evidence for  
197 differential gene expression between social and nonsocial individuals is strongest shortly  
198 following an interaction (Fig 2a). The transcriptomic signatures measured right after the  
199 interaction represent a combination of immediate responses to social stimuli and interactions as  
200 well as some of the initial downstream physiological responses to social behavior. In contrast, at  
201 the 4 hour timepoint individuals had been removed from social interactions for a period of time  
202 so socially regulated genes at this later timepoint reflect downstream consequence of social  
203 interactions<sup>3</sup>. The increased number of differentially expressed genes at the earlier timepoint  
204 may reflect the engagement of a broad set of neural circuits and gene-networks during social  
205 interactions. Conversely, the decrease in differential expression over time could also reflect  
206 divergent response to social outcomes from winners and losers, such that there is more 'noise'  
207 in the transcriptomic signatures of the wasps with recent social experience after a few hours  
208 (see below for follow up analyses).

209  
210 There is a growing literature demonstrating that sensory system tuning and function is more  
211 dynamic and plastic than has been previously appreciated<sup>47-51</sup>. Though examples of sensory  
212 plasticity are often developmental shifts in response to predictable cues such as season or  
213 reproductive state, there is also evidence that individuals' sensory systems respond to their  
214 physical environment<sup>52</sup>. We examined the responses of optic lobes to social interactions in  
215 paper wasps and found modest evidence of differential expression 4 hours after social  
216 interactions (Fig 2a). Among the differentially expressed genes include a dopamine transporter  
217 and a major royal jelly protein, which are both downregulated in the 4-hour time point in social  
218 compared to nonsocial wasps, suggesting the possibility for modulatory effects on the visual  
219 system following social interactions. It is possible that longer-term exposure to social interaction  
220 or isolation could have more dramatic effects on visual systems. Indeed, social experience  
221 during development is required for individual recognition in *P. fuscatus*<sup>53</sup>.

### 222 **Socially responsive genes are enriched for memory-related functions**

223 We identified 61 overrepresented GO terms ( $P < 0.01$ ) among the 742 social DEGs in the full  
224 model with brain region, social experience, and sampling time as separate categorical factors.  
225 Many of the GO terms deal with membrane transport, calcium signaling, synaptic transmission  
226 or behaviors, which are to be expected given that we analyzed a neurogenomic dataset related  
227 to adult behavior (Table S3). A number of the enriched categories, however, suggest other  
228 neurogenomic processes supporting social behavior in *Polistes* wasps. For example, genes  
229 annotated as being involved in cholinergic synaptic transmission are overrepresented among  
230 socially responsive genes (GO:0007271,  $P = 0.0015$ ), suggesting that cholinergic neurons may  
231 play a role in the aggressive encounters between the wasps. Recent work in *Drosophila* has  
232 implicated cholinergic signaling in aggression in both males and females<sup>54-56</sup>, suggesting  
233 potentially shared mechanisms related to aggressive interactions across taxa.

234  
235  
236 Female *P. fuscatus* learn and remember the identity of other wasps from previous interactions<sup>44</sup>  
237 or even outcomes of fights among other individuals they have seen interacting<sup>46</sup>. Behavioral  
238 experiments have demonstrated both short and long-term memories of individuals<sup>44,46</sup>,  
239 suggesting that signatures of both processes may be enriched among differentially regulated  
240 genes. Indeed, genes annotated with functions in anesthesia-resistant memory (GO:0007615,  $P = 3.6e-5$ )  
241 and long-term memory (GO:0007616,  $P = 0.009$ ) are enriched among socially  
242 responsive genes. Anesthesia-resistant memory refers to a process of memory consolidation  
243 that is resistant to disruptions in neural activity, as would be caused by anesthesia<sup>57</sup>. It does not  
244 require protein synthesis and is considered a form of intermediate-term memory<sup>58,59</sup>. Long-term  
245 memory in contrast requires protein synthesis and the reweighting of synaptic connections<sup>60,61</sup>.  
246 A puzzling feature of the expression of genes annotated with memory functions is that they

247 frequently appear to be down regulated among individuals in the social compared to nonsocial  
248 treatments (Fig S1). Memory formation is a dynamic process with multiple steps in which genes  
249 are up- and down-regulated at different times<sup>62</sup> and the observed down-regulation may reflect  
250 aspects of that dynamics process. Most studies of the genetic basis of memory formation in  
251 invertebrates have focused on single cue associations (e.g., a color or smell) but the social  
252 interactions studied here are more complex in terms of sensory inputs and the range of positive  
253 and negative experiences that occur. Global downregulation in the brain may mask upregulation  
254 in specific neurons where social memories are encoded. While these data demonstrate that  
255 social interactions influence the expression of memory-related genes, understanding how these  
256 patterns translate to memory formation (or lack thereof) will require further study.

257  
258 Likely relevant to memory formation, socially responsive genes are enriched for functions  
259 relating to mushroom body development (GO:0016319,  $P = 0.00055$ ), synaptic target  
260 recognition (GO:008039,  $P = 0.00029$ ), and regulation of synaptic plasticity (GO:0048167,  $P =$   
261  $0.0051$ ). Long-term memory formation requires modulation of synaptic connections<sup>62</sup>, which  
262 may be captured by GO terms dealing with changes to synapses including their plasticity and  
263 targeting. Additionally, enrichment for GO terms related to mushroom body development when  
264 seen in the context of an adult brain, are suggestive of a role of mushroom body neuropils in  
265 social processing and memory. The context or features of an interaction that make it more or  
266 less memorable for paper wasps remain to be investigated, though the present study was able  
267 to detect neurogenomic signatures related to memory following interactions in a neutral arena.  
268 How investment in memory may vary across social contexts (on a nest versus a neutral arena)  
269 and the intensity of the interactions are open questions that the present data suggest could be  
270 addressed, at least in part, using transcriptomic techniques.

271

### 272 **Similarities and differences in winner and loser neurogenomic responses**

273 Individual wasps had different experiences of social interactions depending on whether or not  
274 they were the individual giving or receiving more aggression – i.e., whether they were the  
275 winner or the loser of the encounter. Therefore, we considered the neurogenomic responses  
276 separately for the individuals that won or lost the social encounters compared to those that had  
277 not been involved in a social interaction. In a model considering encounter outcome, tissue, and  
278 time as main factors, we found overall similar numbers of DEGs for tissue (4435 DEGs) and  
279 time (22 DEGs) as with the model based on social experience. Both winners and losers had  
280 hundreds of differentially expressed genes compared to nonsocial individuals, though the  
281 neurogenomic response appears to be stronger in losers (Fig 3a, winners = 217 DEGs, losers =  
282 584 DEGs). When directly compared to each other, winners and losers show no significant  
283 differences in gene expression based on the  $FDR < 0.1$  threshold in DESeq2. Even considering  
284 less restrictive criteria for calling DEGs, only 55 genes have  $P < 0.01$  when not correcting for  
285 false discovery rates. The lack of strong differential expression between winners and losers  
286 suggests that the two social outcomes have similar expression profiles when analyzing the  
287 entire dataset, including both brain regions and timepoints. Indeed, there are 113 DEGs shared  
288 between winners and losers, a significantly greater overlap than expected by chance (Fig 3a,  $P$   
289  $< 2e-16$ ). Both winners and losers also show significant overlap with the DEGs responding to  
290 social interactions in general ( $P < 2e-16$  in both cases). Next, we compared the patterns of  
291 differential expression of winners and loser in relation to the nonsocial wasps. The log2 fold  
292 changes in both winners and losers compared to nonsocial wasps in the entire dataset are  
293 strongly correlated (Fig3b, linear model:  $y = 0.84x - 0.02$ ,  $F_{1,4002} = 7458$ ,  $r^2 = 0.65$ ,  $P < 2e-16$ ).  
294 Thus, when considering the entire dataset encompassing both brain regions and sampling  
295 points, winners and losers have broadly similar responses, though with a greater number of  
296 DEGs in losers compared to the nonsocial individuals (Fig 3).

297

298 We investigated the relationship between gene expression patterns in winners and losers  
299 further by comparing the patterns of differential expression relative to nonsocial individuals at  
300 the end of the 45-minute interaction and 4 hours later. Here we present the results of gene  
301 expression in the non-visual brain since we observed stronger effects of social behavior in the  
302 brain than optic lobe (Table S4). We examined the log<sub>2</sub> fold change in expression in losers  
303 relative to nonsocial individuals in a mixed model with winner log<sub>2</sub> fold change relative to  
304 nonsocial individuals and time as fixed effects and gene as a random effect. Differential  
305 expression between winners and nonsocial wasps predicts expression differences in losers  
306 relative to nonsocial wasps ( $t = 69.02$ ,  $df = 7420$ ,  $P < 2e-16$ ). Time was a significant predictor  
307 with greater log<sub>2</sub> fold changes in losers compared to nonsocial wasps at the later time point ( $t =$   
308  $12.27$ ,  $df = 3313$ ,  $P < 2e-16$ ). There was a significant interaction between the extent of  
309 differential expression between winners and nonsocial wasps and time ( $t = 3.3$ ,  $df = 5424$ ,  $P =$   
310  $0.00096$ ). Next, we calculated a separate regression between loser and winner responses  
311 compared to nonsocial individuals at early and later times to further investigate these patterns.  
312 The slope of the regression is steeper though the fit substantially poorer between winners and  
313 losers at the later timepoint compared the earlier sampling time (Fig 4a, early:  $y=0.69x + 0.001$ ,  
314  $r^2 = 0.70$ ; Fig 4b, later:  $y=0.74x - 0.06$ ,  $r^2 = 0.38$ ).

315  
316 Winners and losers show a pattern of increased divergence in non-visual brain gene expression  
317 over time using a distinct analysis method as well. We used weighted correlation network  
318 analysis (WGCNA) to examine patterns of co-expressed genes in relation to social behavior<sup>63</sup>.  
319 WGCNA assigned 6086 genes to 24 modules (mean = 253.58 genes, max = 1091, min = 39).  
320 Multiple modules are significantly associated with winning or losing an encounter. Co-  
321 expression modules associated with winning or losing at either time point are all distinct – i.e.,  
322 no modules are correlated with more than one outcome-time combination (Fig S2). We  
323 examined the relationship among modules and social behaviors by identifying meta-modules,  
324 correlated groups of eigengenes, and examining their relationship with different social  
325 outcomes. The brain dataset contains two large meta-modules that are associated with late  
326 winners and late loser respectively (Fig 4c). In contrast, early sampled losers and winners do  
327 not group within clear meta-modules. WGCNA calculates modules blind to the sample attributes  
328 such as time of sampling, whether wasps had been given a social experience, or the outcome of  
329 that interaction. Nevertheless, WGCNA identifies two distinct gene co-expression meta-modules  
330 associated with late-sampled losers and winners respectively reinforcing the observation that  
331 antagonistic social interactions lead to increased divergence in neurogenomic states over time.

332  
333 Taken together, these data suggest that the overall neurogenomic responses to social  
334 interactions are similar in winners and losers observed in the whole dataset is driven by their  
335 initial similarity at the end of the interaction. The responses diverge over the course of a few  
336 hours, with relatively greater differences relative to individuals that did not experience social  
337 encounters appearing in losers over time. The correlation between winners and losers at the  
338 early time point echoes shared patterns of neural activity observed in mice and bats or shared  
339 transcriptomic signatures among interacting individuals in beta fish<sup>21,22,28</sup>. Given that competitive  
340 social interactions typically lead to divergent outcomes for winners and losers or dominants and  
341 subordinates<sup>4,13,17,64,65</sup>, the initial similarity in neural responses between competing individuals  
342 may seem counterintuitive. The similar neurogenomic responses of winners and losers  
343 observed at the earlier timepoint, however, declines over time in our dataset. The similar early  
344 responses may reflect the activity of neural mechanisms for assessing social stimuli and the  
345 initial processing of the encounter that is shared between the interacting individuals. Divergence  
346 over time may reflect the integration of the outcome into neurogenomic responses that  
347 themselves go on to further influence behavioral states following social encounters. This  
348 divergence among socially interacting wasps likely contributes to the reduced number of



349 differentially expressed genes detected between social and nonsocial treatments at the late time  
350 point due to heterogeneity in expression patterns between winners and losers. Reproductive  
351 division of labor among groups of foundresses is based on physical aggression in *Polistes*<sup>29,30</sup>,  
352 but ultimately results in distinct neural and physiological states between the dominant and  
353 subordinate foundresses<sup>39,66</sup>. Understanding the steps that lead from similar to divergent  
354 neurogenomic states between interacting individuals will help clarify how social experiences  
355 come to generate diversity in physiology and behavior among individuals in a population<sup>3,67</sup>.

356

### 357 **Dynamics changes in gene expression in the hours following a social interaction** 358 **depends on dominance outcome**

359 To investigate the neurogenomic changes that may accompany shifts associated with winning  
360 or losing, we compared the relative magnitude of brain gene expression changes between early  
361 and late losers to those seen between early and late winners (Fig 5). There is a statistically  
362 significant but very weak negative relationship between the relative changes seen in winners  
363 compared to losers (Fig 5:  $F_{2,3709}=23.39$ ,  $P = 1.55e-12$ ,  $r^2 = 0.014$ ). Consistent with the previous  
364 analyses (Fig 4), we find that there are more extreme changes in losers compared to winners,  
365 shown by the greater spread along the y-axis (Fig 5). Interestingly, this observation fits with  
366 theoretical results that loser-effects should be stronger than winner-effects<sup>68</sup>.

367

368 We next examined the identity of genes with extreme changes in both winners and losers to  
369 learn more about the nature of neurogenomic changes. Notable genes are highlighted in Fig 5.  
370 We observe multiple patterns of change including genes that are initially upregulated in losers  
371 relative to nonsocial wasps at the early time point and then substantially decreased at the later  
372 time point. Many of the genes with the largest decreases in losers at the later time show this up-  
373 then-down pattern, including *vitellogenin*, *apolipoprotein III*, *esterase E4* and *apideacin*. Both  
374 *vitellogenin* and *esterase E4* are consistently downregulated in workers compared to queens  
375 across Polistine wasps<sup>69</sup>. Comparisons between worker and gyne *P. metricus* found lower  
376 levels of *apolipoprotein III* in worker- compared to gyne-destined larvae<sup>70</sup>. In *P. canadensis*,  
377 workers have increased apolipoprotein compared to queens<sup>71</sup>. The gene is also upregulated  
378 during usurpation attempts in the socially parasitic *P. sulcifer*, suggesting that gene may have  
379 links to aggression in *Polistes*<sup>72</sup>. Apideacin is an antimicrobial peptide involved in immunity<sup>73</sup>  
380 and shows markedly increased expression in losers following social interactions with a later  
381 decreases (Fig 5b), suggesting possible immune activation in response to receiving aggression.

382

383 *Vitellogenin* (*vg*) is classically recognized for its role as an egg-yolk protein, which has a  
384 conserved role in oogenesis across insects<sup>74</sup>. In paper wasps, levels of *vg* in the head or brain  
385 have been associated with social status, being highest in single and dominant foundresses and  
386 lowest in subordinate foundresses and workers<sup>39,69,71,75</sup>. Our data suggest that *vg* levels quickly  
387 respond to social interaction, rising substantially in both losers and winners relative to nonsocial  
388 controls at the early time point (Fig 5b). Winners maintain high levels of *vg* for hours after the  
389 interactions, while levels plummet in losers below those seen in nonsocial controls. By contrast,  
390 winners maintain high levels of *vg* following social interactions. Nonsocial control wasps show  
391 relatively lower levels of *vg* compared to socially interacting wasps, though it is hard to  
392 contextualize the *vg* levels observed in control wasps compared to those reported in other  
393 studies. Previous studies have examined patterns of gene expression in wasps in relation to life  
394 history state or broader social contexts (e.g. foundresses versus worker) and not in response to  
395 specific social experiences<sup>39,69,71,75</sup>. Additionally, the wasps in this study had been kept in the lab  
396 without nests following other studies of staged aggression contests<sup>36,37,44</sup>, which likely influences  
397 baseline levels of gene expression. Nevertheless, we find that *vg* is strongly upregulated in  
398 response to social interactions in general, but expression levels then diverge depending on  
399 social outcomes. To the extent that *vitellogenin* influences levels of aggression, the decrease

400 seen over time in losers in this study may be indicative of a shift toward a submissive behavioral  
401 state.

402  
403 We observed multiple genes that show increases in expression over time in losers in the central  
404 brain. The most upregulated gene in terms of log<sub>2</sub> fold change in losers is a *myosin heavy chain*  
405 gene, which are upregulated in social wasp worker brains compared to queens<sup>69</sup>. We also  
406 observed a pattern of upregulation of *arrestin* in late losers but down regulation in winners and  
407 control nonsocial wasps. Previous studies of caste differential expression in *P. canadensis*  
408 found that *arrestin* was upregulated in workers relative to queens<sup>71</sup>, and it is found upregulated  
409 among foragers in ants as well<sup>76</sup>. *FPPS* encodes farnesyl pyrophosphate synthase which is  
410 involved in JH production<sup>77,78</sup> and is upregulated in queens in Polistine wasps<sup>69</sup>. We also  
411 observed increases in *inositol monophosphatase (imp)*, which is involved in the inositol  
412 phosphate signaling pathway<sup>79</sup> and has been linked to task differentiation in ants and bees<sup>80,81</sup>.  
413 Losers in our experiment would potentially become subordinate foundresses in a natural nesting  
414 context and not workers, though subordinates do more foraging than dominants<sup>32</sup>. Despite  
415 reduced reproduction and greater foraging relative to dominant foundresses, subordinate  
416 foundresses are not the same as workers and have been shown to have distinct neurogenomic  
417 profiles compared to dominant foundresses and workers in microarray and candidate-gene  
418 studies<sup>39,66,75,82</sup>. Nevertheless, the expression patterns of these genes suggest that within a few  
419 hours of emerging from a social encounter as a subordinate, multiple genes are dynamically  
420 regulated in a manner suggesting changes to aggression, reproduction, and metabolism (Fig 5).

421  
422 Winners showed less extreme changes in gene expression over time compared to losers in our  
423 dataset (Fig 5). Among the genes with largest change by magnitude in winners are two  
424 members of *takeout* gene family, which show substantial decreases in losers (Fig 5). The  
425 *takeout* gene family is found across insects<sup>83</sup> and are they frequently regulated by juvenile  
426 hormone<sup>84-86</sup>. Both winners and losers showed increases in *Nieman Pick Type C2 (NPC2)*,  
427 which regulate steroid hormone biosynthesis including juvenile hormone<sup>87</sup>, and has been  
428 implicated in social communication among ant workers<sup>88</sup>. Notably, all three of these genes are  
429 among the most highly and significantly upregulated genes in the brain in response to social  
430 interactions (Fig 2a, 5b). The significant upregulation of these genes in response to social  
431 interactions and divergent patterns of expression between winners and losers over time make  
432 them interesting candidates for further study.

433

## 434 CONCLUSIONS

435 The analysis of 139 RNAseq samples from the optic lobes and central brains of *P. fuscatus*  
436 foundresses revealed novel insights into the dynamic changes in neurogenomic states in  
437 peripheral and central nervous tissues following social interactions. Female *P. fuscatus* paper  
438 wasps have variable facial patterns that they use to visually recognize each other as  
439 individuals<sup>5,37</sup>. Though we did detect some differentially expressed genes in the optic lobe  
440 transcriptome in response to social interactions, changes in the brain were much larger and  
441 more dynamic, likely reflecting the importance of processing socially relevant information in  
442 more central brain regions as a key factor in driving neurogenomic shifts. After a 45-minute  
443 interaction, winners and losers show similar average changes in patterns of gene expression  
444 relative to nonsocial individuals, which may reflect the fact that the same neural circuits likely  
445 process initial social interactions regardless of the outcome. This result mirrors recent findings  
446 of similar neural firing patterns during social interactions in rodents and bats<sup>21,22</sup> and similar  
447 neurogenomic responses shortly after fights in beta fish<sup>28</sup>.

448

449 Over a span of 4 hours the initial similarity between winners and losers decreases, as loser  
450 gene expression patterns show larger shifts consistent with theoretical predictions of larger loser

451 effects compared to winner effects<sup>68</sup>. The most dramatic shifts in expression over the course of  
452 four hours in losers are due to a mixture of increasing or decreasing expression compared over  
453 time (Fig 5b). These data suggest that within a few hours a single subordinate experience can  
454 influence expression of multiple genes associated with behavioral and physiological differences,  
455 perhaps most notably *vitellogenin*. We do not suggest that a single social experience is  
456 necessarily sufficient to make a wasp into a subordinate foundress. Paper wasps engage in  
457 aggressive interactions on and off the nest early in the nesting cycle<sup>32</sup> and many wasps that go  
458 on to become solitary or dominant foundresses likely experience some social defeats during this  
459 phase. Repeated interactions between co-nesting foundresses, however, are to likely  
460 compound and reinforce the types of effects we observe. Neurogenomic studies show shifts in  
461 neurogenomic profiles in many caste-associated genes in response to repeated wins or losses  
462 in dominance contests in *Ceratina* carpenter bees<sup>11,24</sup>. Paper wasps are notably plastic, with  
463 aggressive and dominant workers becoming more queenlike in the span of a few days when  
464 reproductive opportunities become available through experimental removal of the queen<sup>26,27</sup>.  
465 Moving forward, a major challenge is to understand how social experiences are processed in  
466 the brain giving rise to neurogenomic shifts and changes in expression of key regulators of  
467 behavior such as *vitellogenin*. Specifically, single-cell RNAseq approaches have the potential to  
468 indicate which cell-types are most strongly influenced by social interaction and could reveal how  
469 diverging gene expression patterns give rise to broader physiological consequences associated  
470 with social status.

471

## 472 **METHODS**

### 473 **Experimental design and behavioral scoring**

474 We tested the role of social experience on neurogenomic states comparing the responses of  
475 individuals to staged contests in a neutral arena to solitary experiences in the same arenas.  
476 Subjects were 90 female *P. fuscatus* collected during the pre-worker colony phase from their  
477 nests or while foraging in Tompkins county, New York in the spring of 2018 (Table S1). Wasps  
478 were brought into the lab and provided housing in small deli cups with *ad libitum* access to  
479 sugar and water. Prior to the trials, wasps were given identifying paint marks using Testor's  
480 enamel paint to facilitate scoring of social interactions. During the trials, wasps were placed in a  
481 small neutral arena (100 mm diameter clear petri dish) with a plexiglass-lid under bright full  
482 spectrum lights either alone or with another wasp. Social trials featured pairings between  
483 weight-matched wasps that had been collected at distinct locations at least 2 kilometers apart,  
484 which is greater than the typical dispersal distances for this population<sup>89</sup>. While in the arenas,  
485 wasps were filmed for 45 minutes and then removed from the arenas. In half of the trials, wasps  
486 were immediately sacrificed by decapitation and their heads were placed in RNAlater for  
487 subsequent analysis. To aid uptake of RNAlater, small cuts were made on the exoskeleton of  
488 the head avoiding damaging neural tissue. In the other half of the trials, the wasps were  
489 returned to their individual housing and sacrificed 4 hours later using the same protocol. This  
490 generated four sets of samples: early social wasps (n = 30 wasps from 15 trials), early  
491 nonsocial wasps (n = 15), late social wasps (n = 30), and late nonsocial wasps (n=15, Fig 1a).

492

493 Videos of the social wasps were scored for stereotyped paper wasp aggressive behaviors  
494 including mounting, biting, hitting, grappling and darting<sup>32,41</sup>. Additionally, we scored when one  
495 wasp chased the other as an aggressive act. On average there were  $33.13 \pm 12.58$  aggressive  
496 acts per trial. We categorized outcomes of encounters as either a win or loss based on the  
497 relative level of aggressive acts and whether or not one wasp mounted the other, a ritualized  
498 dominance behavior<sup>32</sup>.

499

### 500 **RNA sequencing and read processing**

501 Brains were dissected from RNAlater-preserved wasp heads under a stereomicroscope. Optic  
502 lobes were separated from the rest of the brain (Fig 1b) and then combined for processing. We  
503 refer to these two tissue segments simply as the optic lobe and brain respectively in the text.  
504 RNA was extracted separately from the brain and combined optic lobes generating two pools of  
505 RNA from each wasp. Extracted RNA samples were sent to the Cornell Genomics Core for  
506 3'RNA library preparation using the Lexogen kit. Due to low and/or poor-quality RNA yields for  
507 some samples, we were able to sequence 168 samples out of the intended 180. We sequenced  
508 libraries to an average coverage of 5.17 million single end 50 bp reads on a NextSeq500.  
509 Samples with less than 1 million reads were excluded from analyses due to their relatively low  
510 coverage, resulting in a final group of 139 RNAseq samples for analysis (Table S1).

511  
512 We mapped reads to the *P. fuscatus* genome<sup>42</sup> using STAR<sup>90</sup>. Read counts were calculated  
513 using HTseq with default settings<sup>91</sup>. Initial read counts revealed that the annotation of the *P.*  
514 *fuscatus* genome did not capture many 3' untranslated regions, so we manually scanned the  
515 genome to update gene body annotations. To identify 3' untranslated regions we jointly  
516 visualized paired-end mRNAseq reads from female *P. fuscatus* heads with a sample of 3'  
517 RNAseq reads using the Integrated Genome Viewer<sup>92</sup> and updated a GTF file based on this  
518 scan. In addition to extending the UTRs, in some cases we combined genes, separated genes  
519 or identified genes not previously included in the prior annotation. The GTF file used for this  
520 study is provided as a supplemental file. Before engaging in downstream differential expression  
521 analyses, we first inspected the separation of the samples using principal component analysis  
522 (PCA) to ensure that brain and optic lobe tissues had distinct expression profiles, as would be  
523 expected based on differential cellular composition of the samples. The PCA was calculated by  
524 using the 'vst' normalization function of DESeq2<sup>93</sup>. Inspection of the samples plotted against  
525 PC1 and PC2 revealed 2 distinct clusters of samples corresponding to optic lobe and brain  
526 respectively (Fig 1b). Additionally, we removed non-expressed or lowly-expressed genes from  
527 the count table in order to make analyses faster. After filtering, we were left with 8219 genes for  
528 further analyses.

### 529 **Gene expression analyses**

531 Patterns of differential expression were determined using DESeq2<sup>93</sup> in R v 3.6.2 (R Team  
532 2019). Depending on the analysis we examined the entire data set (both brain and optic lobes),  
533 only the brain data or only the optic lobe data using linear models with fixed effects. All R code  
534 used for analysis is provided. First, we considered models with social experience treatment  
535 (social v. nonsocial), tissue (brain v. optic lobe) and time (early v. late). We examined the  
536 interactive effects following the recommendations of the authors of the DESeq2 analysis  
537 package<sup>93</sup>. We generated combined variables to examine differences in expression across  
538 groups. For example, to look at the effects of time and social experience we classified samples  
539 as belonging to one of four groups early\_social, early\_nonsocial, late\_social, or late\_nonsocial  
540 under a single categorical variable, e.g., time\_social. By comparing contrasts among the  
541 different pairs of categories, we were able to determine how different combinations of samples  
542 influence patterns of differential gene expression. For analyses looking at contest outcome, we  
543 only examined social trials for which at least 10 aggressive acts occurred. The outcome of the  
544 trial was coded as winner, loser or nonsocial. Genes were considered to be differentially  
545 expressed if the FDR adjusted P value  $\leq 0.1$ .

546  
547 We compared patterns of differential expression in winners and losers, based on log2 fold  
548 changes in expression. Since absolutely small changes in lowly expressed genes can give rise  
549 to large log2 fold changes, we first removed all genes with mean expression below 100 before  
550 comparing patterns of expression. First, we compared expression relative to nonsocial wasps in  
551 winners and losers respectively in the combined brain and optic lobe datasets. In analyses

552 focusing solely on the brain dataset, we examined how the relations between winner and loser  
553 expression profiles changed between early and late sampling points using a general linear  
554 mixed model implemented in the lme4 package for R<sup>95</sup>. Log2 fold change differences in  
555 expression relative to nonsocial wasps sacrificed at the same time were used as a basis of  
556 comparison. We modeled relative fold change in losers as a function of the relative fold change  
557 in winners, time, their interaction, and gene ID as a random effect. We also separately  
558 examined the relationship between winners and losers at early and late time points using a  
559 linear model. Finally, we compared the relative log2 fold changes between the earlier and later  
560 time points for losers to the changes observed in winners. In these comparisons positive values  
561 of expression denote increased expression at the later time point.  
562

563 Genes are frequently expressed in a modular manner, with groups of genes showing similar  
564 expression patterns<sup>63</sup>, so we calculated co-expression modules from our brain dataset using  
565 WGCNA. This analysis focused on understanding modules associated with winning or losing at  
566 different time points, so we limited our analysis to a subset of the brain RNAseq data set that  
567 had engaged in more vigorous encounters (i.e., winner, loser and nonsocial). R code used for  
568 analysis is provided as a supplemental file.  
569

### 570 **Gene ontology**

571 We used gene ontology enrichment analyses to identify gene functions that were enriched in  
572 our various parts of our dataset. The *P. fuscatus* gene set was annotated using the Blast2GO  
573 function of OmicsBox based on sequence similarity with *Drosophila melanogaster* genes<sup>96</sup>. For  
574 enrichment analyses, we used the TopGO package in R<sup>97</sup>. We only included categories with at  
575 least 10 annotated genes in the dataset. Significantly over-represented categories were  
576 identified using the 'weigh01' function in TopGO with the 'classicfisher' statistic.  
577

578 **Data Availability**

579

580 Raw sequence data are available in the NCBI Short Read Archive under PRJNA705303.

581

582

583 **Funding**

584 This research was funded by grant NIH-DP2-GM128202 to MJS.

585

586

587 **Author contributions**

588 FMK, CMJ and MJS designed the study. FMK and CMJ conducted behavioral trials. FMK  
589 processed tissue samples and extracted RNA. NZ scored behavioral trials. SEM, NZ, EM and  
590 MJS processed and aligned RNA data. MJS analyzed the data and wrote the manuscript with  
591 input from the other authors.

592

593 **REFERENCES**

594

- 595 1. Ligon, R. A. Defeated chameleons darken dynamically during dyadic disputes to decrease  
596 danger from dominants. *Behav. Ecol. Sociobiol.* **68**, 1007–1017 (2014).
- 597 2. Chandrasekaran, S. *et al.* Aggression is associated with aerobic glycolysis in the honey bee  
598 brain1. *Genes Brain Behav.* **14**, 158–166 (2015).
- 599 3. Rittschof, C. C. & Hughes, K. A. Advancing behavioural genomics by considering timescale.  
600 *Nat. Commun.* **9**, 1–11 (2018).
- 601 4. Snyder-Mackler, N. *et al.* Social determinants of health and survival in humans and other  
602 animals. *Science* **368**, (2020).
- 603 5. Sheehan, M. J. & Tibbetts, E. A. Specialized face learning is associated with individual  
604 recognition in paper wasps. *science* **334**, 1272–1275 (2011).
- 605 6. Rittschof, C. C. *et al.* Neuromolecular responses to social challenge: Common mechanisms  
606 across mouse, stickleback fish, and honey bee. *Proc. Natl. Acad. Sci.* **111**, 17929–17934  
607 (2014).
- 608 7. Dugatkin, L. A. & Earley, R. L. Group fusion: the impact of winner, loser, and bystander  
609 effects on hierarchy formation in large groups. *Behav. Ecol.* **14**, 367–373 (2003).
- 610 8. Hsu, Y. Y., Lee, I. H. & Lu, C. K. Prior contest information: mechanisms underlying winner  
611 and loser effects. *Behav. Ecol. Sociobiol.* **63**, 1247–1257 (2009).
- 612 9. Lehner, S. R., Rutte, C. & Taborsky, M. Rats benefit from winner and loser effects. *Ethology*  
613 **117**, 949–960 (2011).
- 614 10. Trannoy, S., Penn, J., Lucey, K., Popovic, D. & Kravitz, E. A. Short and long-lasting behavioral  
615 consequences of agonistic encounters between male *Drosophila melanogaster*. *Proc. Natl.*  
616 *Acad. Sci.* **113**, 4818–4823 (2016).
- 617 11. Withee, J. R. & Rehan, S. M. Social aggression, experience, and brain gene expression in a  
618 subsocial bee. *Integr. Comp. Biol.* **57**, 640–648 (2017).
- 619 12. Harrison, L. M., Jennions, M. D. & Head, M. L. Does the winner–loser effect determine male  
620 mating success? *Biol. Lett.* **14**, 20180195 (2018).
- 621 13. Tibbetts, E. A., Fearon, M. L., Wong, E., Huang, Z. Y. & Tinghitella, R. M. Rapid juvenile  
622 hormone downregulation in subordinate wasp queens facilitates stable cooperation. *Proc.*  
623 *R. Soc. B Biol. Sci.* **285**, 20172645 (2018).
- 624 14. Reeve, H. K., Starks, P. T., Peters, J. M. & Nonacs, P. Genetic support for the evolutionary  
625 theory of reproductive transactions in social wasps. *Proc. R. Soc. Lond. B Biol. Sci.* **267**, 75–  
626 79 (2000).
- 627 15. Seppa, P., Queller, D. C. & Strassmann, J. E. Reproduction in foundress associations of the  
628 social wasp, *Polistes carolina*: conventions, competition, and skew. *Behav. Ecol.* **13**, 531–  
629 542 (2002).
- 630 16. Gospocic, J. *et al.* The neuropeptide corazonin controls social behavior and caste identity in  
631 ants. *Cell* **170**, 748–759. e12 (2017).
- 632 17. Razzoli, M. *et al.* Social stress shortens lifespan in mice. *Aging Cell* **17**, (2018).
- 633 18. Bukhari, S. A. *et al.* Temporal dynamics of neurogenomic plasticity in response to social  
634 interactions in male threespined sticklebacks. *PLoS Genet.* **13**, e1006840 (2017).
- 635 19. Saul, M. C. *et al.* Transcriptional regulatory dynamics drive coordinated metabolic and  
636 neural response to social challenge in mice. *Genome Res.* **27**, 959–972 (2017).

- 637 20. O'Connell, L. A. & Hofmann, H. A. Evolution of a vertebrate social decision-making network.  
638 *Science* **336**, 1154–1157 (2012).
- 639 21. Kingsbury, L. *et al.* Correlated neural activity and encoding of behavior across brains of  
640 socially interacting animals. *Cell* **178**, 429–446. e16 (2019).
- 641 22. Zhang, W. & Yartsev, M. M. Correlated neural activity across the brains of socially  
642 interacting bats. *Cell* **178**, 413–428. e22 (2019).
- 643 23. Oliveira, R. F. *et al.* Assessment of fight outcome is needed to activate socially driven  
644 transcriptional changes in the zebrafish brain. *Proc. Natl. Acad. Sci.* **113**, E654–E661 (2016).
- 645 24. Steffen, M. A. & Rehan, S. M. Genetic signatures of dominance hierarchies reveal conserved  
646 cis-regulatory and brain gene expression underlying aggression in a facultatively social bee.  
647 *Genes Brain Behav.* **19**, e12597 (2020).
- 648 25. Opachaloemphan, C. *et al.* Early behavioral and molecular events leading to caste switching  
649 in the ant *Harpegnathos*. *Genes Dev.* (2021).
- 650 26. Taylor, B. A., Cini, A., Cervo, R., Reuter, M. & Sumner, S. Queen succession conflict in the  
651 paper wasp *Polistes dominula* is mitigated by age-based convention. *Behav. Ecol.* **31**, 992–  
652 1002 (2020).
- 653 27. Taylor, B. A., Cini, A., Wyatt, C. D., Reuter, M. & Sumner, S. The molecular basis of socially  
654 mediated phenotypic plasticity in a eusocial paper wasp. *Nat. Commun.* **12**, 1–10 (2021).
- 655 28. Vu, T.-D. *et al.* Behavioral and brain-transcriptomic synchronization between the two  
656 opponents of a fighting pair of the fish *Betta splendens*. *PLoS Genet.* **16**, e1008831 (2020).
- 657 29. Reeve, H. K. *Polistes*. in *The Social Biology of Wasps* 99–148 (Comstock, 1991).
- 658 30. Jandt, J. M., Tibbetts, E. A. & Toth, A. L. *Polistes* paper wasps: a model genus for the study  
659 of social dominance hierarchies. *Insectes Sociaux* **61**, 11–27 (2014).
- 660 31. Sheehan, M. J. *et al.* Different axes of environmental variation explain the presence vs.  
661 extent of cooperative nest founding associations in *Polistes* paper wasps. *Ecol. Lett.* **18**,  
662 1057–1067 (2015).
- 663 32. West Eberhard, M. J. *The Social Biology of Polistine Wasps*. (Museum of Zoology, University  
664 of Michigan, 1969).
- 665 33. Gamboa, G. J., Wacker, T. L., Duffy, K. G., Dobson, S. W. & Fishwild, T. G. Defense against  
666 intraspecific usurpation by paper wasp cofoundresses (*Polistes fuscatus*, Hymenoptera,  
667 Vespidae). *Can. J. Zool.-Rev. Can. Zool.* **70**, 2369–2372 (1992).
- 668 34. Tibbetts, E. A. & Reeve, H. K. Aggression and resource sharing among foundresses in the  
669 social wasp *Polistes dominulus*: testing transactional theories of conflict. *Behav. Ecol.*  
670 *Sociobiol.* **48**, 344–352 (2000).
- 671 35. Mora-Kepfer, F. Context-dependent acceptance of non-nestmates in a primitively eusocial  
672 insect. *Behav. Ecol. Sociobiol.* **68**, 363–371 (2014).
- 673 36. Tibbetts, E. A. & Dale, J. A socially enforced signal of quality in a paper wasp. *Nature* **432**,  
674 218–222 (2004).
- 675 37. Sheehan, M. J. & Tibbetts, E. A. Evolution of identity signals: Frequency-dependent benefits  
676 of distinctive phenotypes used for individual recognition. *Evolution* **63**, 3106–3113 (2009).
- 677 38. Berens, A. J., Tibbetts, E. A. & Toth, A. L. Candidate genes for individual recognition in  
678 *Polistes fuscatus* paper wasps. *J. Comp. Physiol. A* **202**, 115–129 (2016).



- 679 39. Toth, A. L. *et al.* Shared genes related to aggression, rather than chemical communication,  
680 are associated with reproductive dominance in paper wasps (*Polistes metricus*). *BMC*  
681 *Genomics* **15**, 75 (2014).
- 682 40. Tibbetts, E. A. Visual signals of individual identity in the wasp *Polistes fuscatus*. *Proc. R. Soc.*  
683 *Lond. B Biol. Sci.* **269**, 1423–1428 (2002).
- 684 41. Sheehan, M. J. & Tibbetts, E. A. Selection for individual recognition and the evolution of  
685 polymorphic identity signals in *Polistes* paper wasps. *J. Evol. Biol.* **23**, 570–577 (2010).
- 686 42. Miller, S. E. *et al.* Evolutionary dynamics of recent selection on cognitive abilities. *Proc. Natl.*  
687 *Acad. Sci.* **117**, 3045–3052 (2020).
- 688 43. Berens, A. J., Tibbetts, E. A. & Toth, A. L. Cognitive specialization for learning faces is  
689 associated with shifts in the brain transcriptome of a social wasp. *J. Exp. Biol.* **220**, 2149–  
690 2153 (2017).
- 691 44. Sheehan, M. J. & Tibbetts, E. A. Robust long-term social memories in a paper wasp. *Curr.*  
692 *Biol. CB* **18**, R851–R852 (2008).
- 693 45. Li, L. *et al.* Large-scale transcriptome changes in the process of long-term visual memory  
694 formation in the bumblebee, *Bombus terrestris*. *Sci. Rep.* **8**, 1–10 (2018).
- 695 46. Tibbetts, E. A., Wong, E. & Bonello, S. Wasps use social eavesdropping to learn about  
696 individual rivals. *Curr. Biol.* **30**, 3007–3010. e2 (2020).
- 697 47. Sisneros, J. A. & Bass, A. H. Seasonal plasticity of peripheral auditory frequency sensitivity. *J.*  
698 *Neurosci.* **23**, 1049–1058 (2003).
- 699 48. Dey, S. *et al.* Cyclic regulation of sensory perception by a female hormone alters behavior.  
700 *Cell* **161**, 1334–1344 (2015).
- 701 49. Walker, S. J., Corrales-Carvajal, V. M. & Ribeiro, C. Postmating circuitry modulates salt taste  
702 processing to increase reproductive output in *Drosophila*. *Curr. Biol.* **25**, 2621–2630 (2015).
- 703 50. van der Linden, C., Jakob, S., Gupta, P., Dulac, C. & Santoro, S. W. Sex separation induces  
704 differences in the olfactory sensory receptor repertoires of male and female mice. *Nat.*  
705 *Commun.* **9**, 1–15 (2018).
- 706 51. Butler, J. M. *et al.* Reproductive state-dependent plasticity in the visual system of an African  
707 cichlid fish. *Horm. Behav.* **114**, 104539 (2019).
- 708 52. Veen, T., Brock, C., Rennison, D. & Bolnick, D. Plasticity contributes to a fine-scale depth  
709 gradient in sticklebacks' visual system. *Mol. Ecol.* **26**, 4339–4350 (2017).
- 710 53. Tibbetts, E. A., Desjardins, E., Kou, N. & Wellman, L. Social isolation prevents the  
711 development of individual face recognition in paper wasps. *Anim. Behav.* **152**, 71–77  
712 (2019).
- 713 54. Alekseyenko, O. V. *et al.* Serotonergic modulation of aggression in *Drosophila* involves  
714 GABAergic and cholinergic opposing pathways. *Curr. Biol.* **29**, 2145–2156. e5 (2019).
- 715 55. Palavicino-Maggio, C. B., Chan, Y.-B., McKellar, C. & Kravitz, E. A. A small number of  
716 cholinergic neurons mediate hyperaggression in female *Drosophila*. *Proc. Natl. Acad. Sci.*  
717 **116**, 17029–17038 (2019).
- 718 56. Schretter, C. E. *et al.* Cell types and neuronal circuitry underlying female aggression in  
719 *Drosophila*. *Elife* **9**, e58942 (2020).
- 720 57. Tully, T., Preat, T., Boynton, S. C. & Del Vecchio, M. Genetic dissection of consolidated  
721 memory in *Drosophila*. *Cell* **79**, 35–47 (1994).
- 722 58. McGaugh, J. L. Memory--a century of consolidation. *Science* **287**, 248–251 (2000).

- 723 59. Mery, F. & Kawecki, T. J. A cost of long-term memory in *Drosophila*. *Science* **308**, 1148–1148  
724 (2005).
- 725 60. Moncada, D. & Viola, H. Induction of long-term memory by exposure to novelty requires  
726 protein synthesis: evidence for a behavioral tagging. *J. Neurosci.* **27**, 7476–7481 (2007).
- 727 61. Jarome, T. J. & Helmstetter, F. J. Protein degradation and protein synthesis in long-term  
728 memory formation. *Front. Mol. Neurosci.* **7**, 61 (2014).
- 729 62. Kandel, E. R., Dudai, Y. & Mayford, M. R. The molecular and systems biology of memory. *Cell*  
730 **157**, 163–186 (2014).
- 731 63. Langfelder, P. & Horvath, S. WGCNA: an R package for weighted correlation network  
732 analysis. *BMC Bioinformatics* **9**, 559 (2008).
- 733 64. Creel, S. Dominance, aggression, and glucocorticoid levels in social carnivores. *J. Mammal.*  
734 **86**, 255–264 (2005).
- 735 65. Williamson, C. M., Lee, W., Romeo, R. D. & Curley, J. P. Social context-dependent  
736 relationships between mouse dominance rank and plasma hormone levels. *Physiol. Behav.*  
737 **171**, 110–119 (2017).
- 738 66. Toth, A. L. *et al.* Brain transcriptomic analysis in paper wasps identifies genes associated  
739 with behaviour across social insect lineages. *Proc. R. Soc. Lond. B Biol. Sci.* **277**, 2139–2148  
740 (2010).
- 741 67. Cardoso, S. D., Teles, M. C. & Oliveira, R. F. Neurogenomic mechanisms of social plasticity. *J.*  
742 *Exp. Biol.* **218**, 140–149 (2015).
- 743 68. Leimar, O. The evolution of social dominance through reinforcement learning. *bioRxiv*  
744 (2020).
- 745 69. Wyatt, C. D. *et al.* Genetic toolkit for sociality predicts castes across the spectrum of social  
746 complexity in wasps. *bioRxiv* (2020).
- 747 70. Hunt, J. H. *et al.* Differential gene expression and protein abundance evince ontogenetic  
748 bias toward castes in a primitively eusocial wasp. *PLoS One* **5**, e10674 (2010).
- 749 71. Sumner, S., Pereboom, J. J. & Jordan, W. C. Differential gene expression and phenotypic  
750 plasticity in behavioural castes of the primitively eusocial wasp, *Polistes canadensis*. *Proc. R.*  
751 *Soc. Lond. B Biol. Sci.* **273**, 19–26 (2006).
- 752 72. Cini, A. *et al.* Social parasitism and the molecular basis of phenotypic evolution. *Front.*  
753 *Genet.* **6**, 32 (2015).
- 754 73. Casteels, P., Ampe, C., Jacobs, F., Vaeck, M. & Tempst, P. Apidaecins: antibacterial peptides  
755 from honeybees. *EMBO J.* **8**, 2387–2391 (1989).
- 756 74. Hagedorn, H. H. & Kunkel, J. G. Vitellogenin and vitellin in insects. *Annu. Rev. Entomol.* **24**,  
757 475–505 (1979).
- 758 75. Manfredini, F., Brown, M. J. & Toth, A. L. Candidate genes for cooperation and aggression in  
759 the social wasp *Polistes dominula*. *J. Comp. Physiol. A* **204**, 449–463 (2018).
- 760 76. Feldmeyer, B., Elsner, D. & Foitzik, S. Gene expression patterns associated with caste and  
761 reproductive status in ants: worker-specific genes are more derived than queen-specific  
762 ones. *Mol. Ecol.* **23**, 151–161 (2014).
- 763 77. Tsang, S. S. *et al.* Diversity of insect sesquiterpenoid regulation. *Front. Genet.* **11**, (2020).
- 764 78. Bomtorin, A. D. *et al.* Juvenile hormone biosynthesis gene expression in the corpora allata  
765 of honey bee (*Apis mellifera* L.) female castes. *PLoS One* **9**, e86923 (2014).

- 766 79. Berridge, M. J. Inositol trisphosphate and calcium signalling mechanisms. *Biochim. Biophys.*  
767 *Acta BBA-Mol. Cell Res.* **1793**, 933–940 (2009).
- 768 80. Lutz, C. C., Rodriguez-Zas, S. L., Fahrbach, S. E. & Robinson, G. E. Transcriptional response to  
769 foraging experience in the honey bee mushroom bodies. *Dev. Neurobiol.* **72**, 153–166  
770 (2012).
- 771 81. Friedman, D. A. *et al.* The role of dopamine in the collective regulation of foraging in  
772 harvester ants. *Isience* **8**, 283–294 (2018).
- 773 82. Toth, A. L. *et al.* Wasp gene expression supports an evolutionary link between maternal  
774 behavior and eusociality. *Science* **318**, 441–444 (2007).
- 775 83. Vanaphan, N., Dauwalder, B. & Zufall, R. A. Diversification of takeout, a male-biased gene  
776 family in *Drosophila*. *Gene* **491**, 142–148 (2012).
- 777 84. Du, J., Hiruma, K. & Riddiford, L. M. A novel gene in the takeout gene family is regulated by  
778 hormones and nutrients in *Manduca* larval epidermis. *Insect Biochem. Mol. Biol.* **33**, 803–  
779 814 (2003).
- 780 85. Hagai, T., Cohen, M. & Bloch, G. Genes encoding putative Takeout/juvenile hormone  
781 binding proteins in the honeybee (*Apis mellifera*) and modulation by age and juvenile  
782 hormone of the takeout-like gene GB19811. *Insect Biochem. Mol. Biol.* **37**, 689–701 (2007).
- 783 86. Chamseddin, K. H. *et al.* takeout-dependent longevity is associated with altered Juvenile  
784 Hormone signaling. *Mech. Ageing Dev.* **133**, 637–646 (2012).
- 785 87. Huang, X., Warren, J. T., Buchanan, J., Gilbert, L. I. & Scott, M. P. *Drosophila* Niemann-Pick  
786 type C-2 genes control sterol homeostasis and steroid biosynthesis: a model of human  
787 neurodegenerative disease. *Development* **134**, 3733–3742 (2007).
- 788 88. Ishida, Y. *et al.* Niemann–Pick type C2 protein mediating chemical communication in the  
789 worker ant. *Proc. Natl. Acad. Sci.* **111**, 3847–3852 (2014).
- 790 89. Blucher, S. E., Miller, S. E. & Sheehan, M. J. Fine-scale population structure but limited  
791 genetic differentiation in a cooperatively breeding paper wasp. *Genome Biol. Evol.* **12**, 701–  
792 714 (2020).
- 793 90. Dobin, A. *et al.* STAR: ultrafast universal RNA-seq aligner. *Bioinformatics* **29**, 15–21 (2013).
- 794 91. Anders, S., Pyl, P. T. & Huber, W. HTSeq—a Python framework to work with high-  
795 throughput sequencing data. *Bioinformatics* **31**, 166–169 (2015).
- 796 92. Robinson, J. T., Thorvaldsdóttir, H., Wenger, A. M., Zehir, A. & Mesirov, J. P. Variant review  
797 with the integrative genomics viewer. *Cancer Res.* **77**, e31–e34 (2017).
- 798 93. Love, M. I., Huber, W. & Anders, S. Moderated estimation of fold change and dispersion for  
799 RNA-seq data with DESeq2. *Genome Biol.* **15**, 550 (2014).
- 800 94. Team, R. C. *R: A language and environment for statistical computing.* (Vienna, Austria,  
801 2013).
- 802 95. Bates, D., Sarkar, D., Bates, M. D. & Matrix, L. The lme4 package. *R Package Version* **2**, 74  
803 (2007).
- 804 96. Conesa, A. *et al.* Blast2GO: a universal tool for annotation, visualization and analysis in  
805 functional genomics research. *Bioinformatics* **21**, 3674–3676 (2005).
- 806 97. Alexa, A. & Rahnenführer, J. Gene set enrichment analysis with topGO. *Bioconductor Improv*  
807 **27**, (2009).
- 808
- 809

810 **Figure 1: Overview of experimental design and RNAseq data**

811 (A) The experiment consisted of generating two groups of wild-caught wasps that either  
812 engaged in a recent social experience or remained nonsocial. Half of each group was sacrificed  
813 at the end of a 45-minute interaction period with the other half held in individual containers for 4  
814 hours until they were then sacrificed. RNA was extracted separately from the combined optic  
815 lobes (purple) and the remainder of the brain, called 'brain' throughout (green). In other figures,  
816 we show the part the tissue the data is derived from with the relevant icon. (B) Tissue is the  
817 strongest separator of the data in a principal component analysis. Within the brain, but not the  
818 optic lobe, social experience also has a major influence on neurogenomic patterns. Here and in  
819 subsequent figures, red wasp symbols are used to indicate winners, blue wasp symbols for  
820 losers, and grey wasps for control individuals that did not have social interactions.

821

822 **Figure 2: Social interactions influence neurogenomic signatures more in the brain than**  
823 **optic lobe**

824 (A) The effects of social interactions are stronger in the brain compared the optic lobe. At both  
825 early and late time points there are hundreds of genes differentially expressed ( $FDR < 0.1$ )  
826 between social and nonsocial groups. The following codes are used in the axis legend: ES =  
827 early social, EN = early nonsocial, LS = late social, LN = late nonsocial. (B) The volcano plots  
828 show the  $\log_2$  fold change between social (up) and nonsocial (down) on the x-axis and the -  
829  $\log_{10}$  P value. The red and blue striped wasp symbol indicates that the data includes all socially  
830 interacting wasps.

831

832 **Figure 3: Similar overall neurogenomic responses in winners and losers**

833 (A) There is significantly more overlap than expected by chance between the DEGs for winners  
834 and loser compared to each other as well as both winner and loser compared to all individuals  
835 with recent social experience ( $P < 2e-16$ ). (B) The difference in  $\log_2$  fold change in gene  
836 expression for all genes with a mean expression count of 100 or greater for nonsocial  
837 individuals are correlated for winners and losers. Both panels show analyses from the entire  
838 dataset with both brain regions and time points combined.

839

840 **Figure 4: Divergence in loser brain transcriptomes over time**

841 (A) Focusing on only the brain dataset, the  $\log_2$  fold change in gene expression differences  
842 between nonsocial individuals and winners and losers are well correlated at the earlier time  
843 point. (B) At the later time point, there is substantially less correlation between winner and loser  
844 responses relative to nonsocial individuals. (C) Gene correlation modules are organized into two  
845 meta-modules, which are associated with late winners and late losers respectively. The top  
846 panel shows a dendrogram with the colors labeled and social outcomes labeled. The boxes  
847 have been added to highlight the two meta-modules. The bottom panel shows a heatmap  
848 showing the relationships among modules. Higher correlations are show by warmer red colors  
849 with modules with low or not correlations shown in blue. The two meta-modules highlighted in  
850 the dendrogram have been highlighted here with black outlines.

851

852 **Figure 5: Shifts in winner and loser gene expression over time**

853 (A) There are more dramatic shifts in the responses of losers compared to winners over time.  
854 The scatter plot shows the  $\log_2$  fold change between early and late winners on the x-axis  
855 against the similar early to late comparison for losers on the y-axis. Thus, genes in the upper  
856 right quadrant are those that increase over time in both winners and losers, while those the  
857 upper left quadrant increase in losers but decrease in winners. The greater spread along the y-  
858 compared to x-axis shows that there are larger changes in loser gene expression profiles over  
859 time compared to winners. There is a weak but significant negative correlation suggesting that  
860 some genes that increase in losers tend to decrease in winner and vice versa. Notable gene are

861 highlighted. Data points are color-coded according to the legend. (B) The panels show the mean  
862 normalized count of expression for losers, winners and nonsocial individuals at early and late  
863 sampling points. Lines are drawn connecting the points between groups of the same social  
864 outcome. Note that the y-axis is different for each gene and depends on the dynamic range of  
865 the specific gene. For example, *arrestin* shows a much smaller change in expression across  
866 groups than *takeout-like 1*, which is expressed at very low levels in nonsocial controls but  
867 expressed much more highly in wasps that engaged in social interactions.  
868

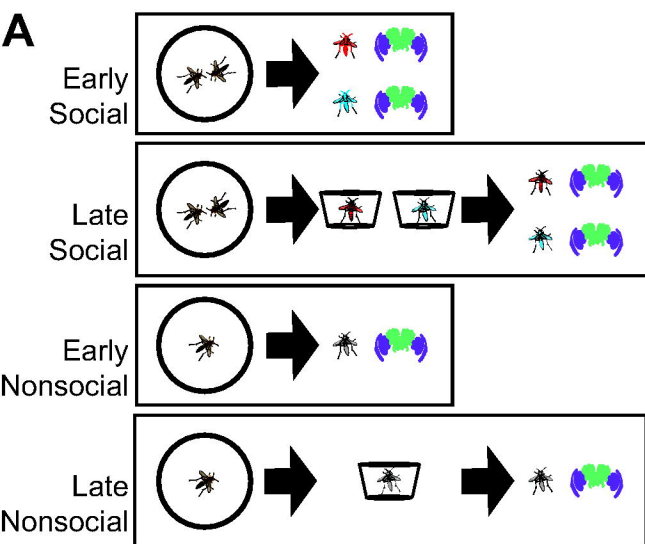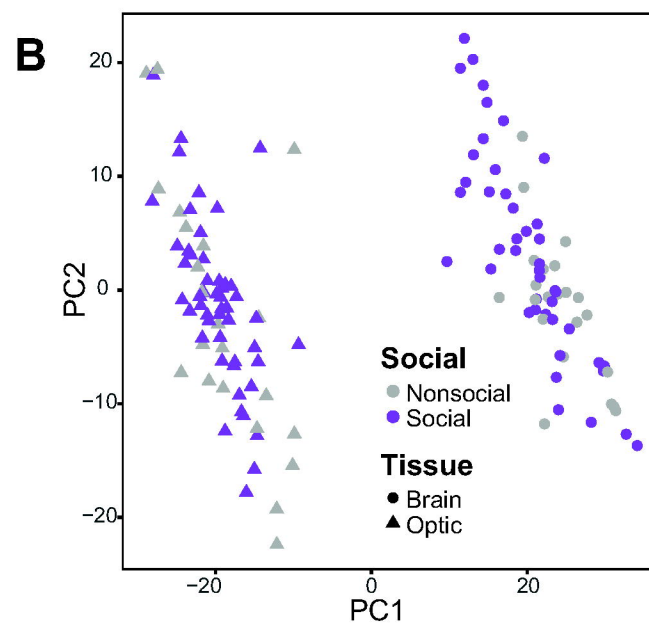

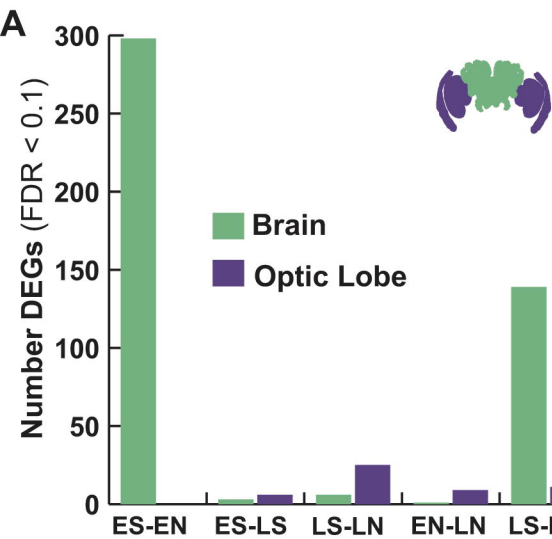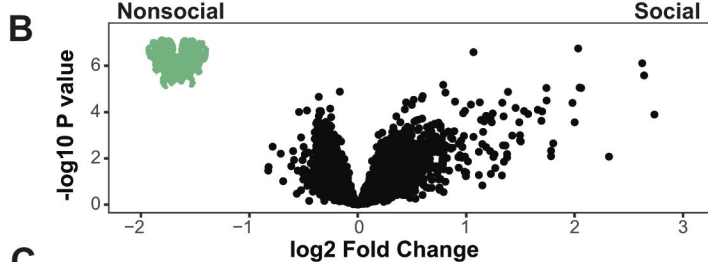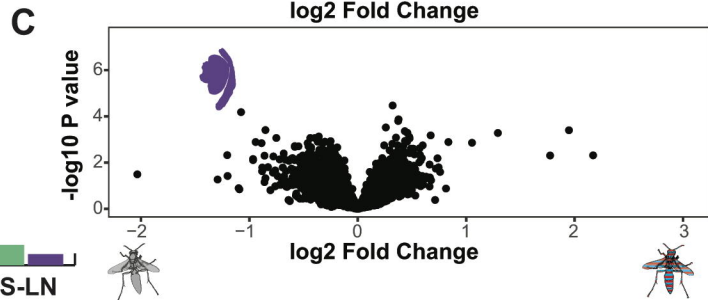

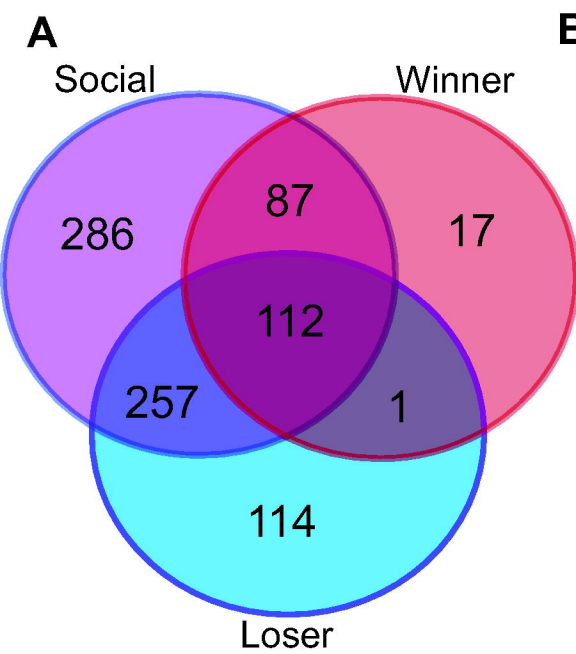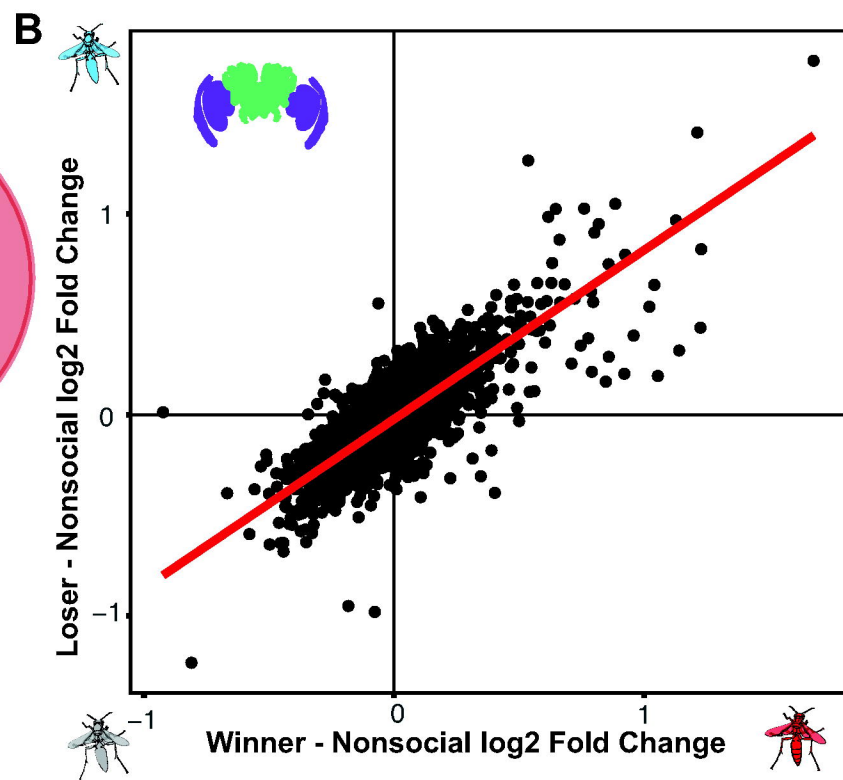



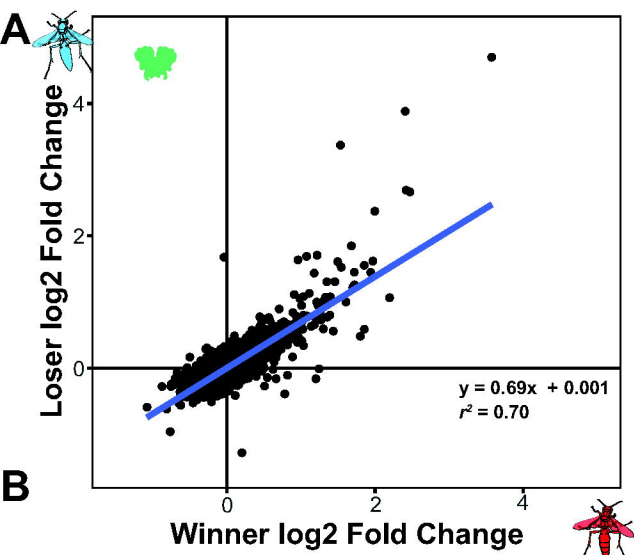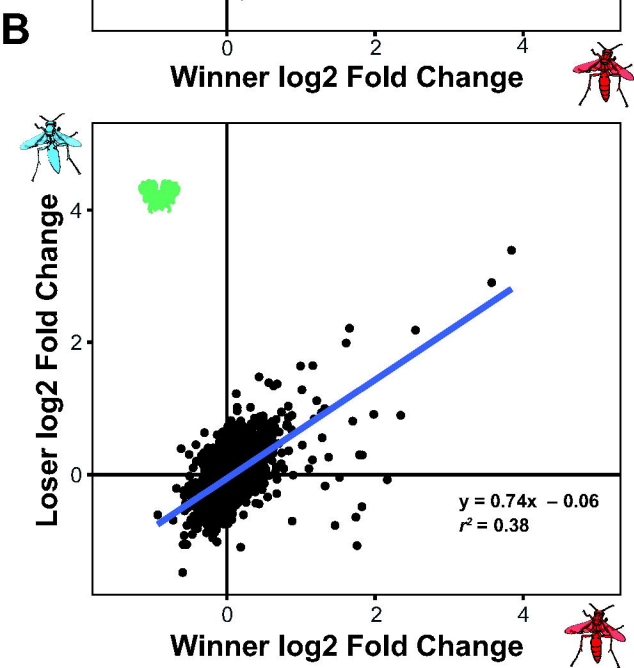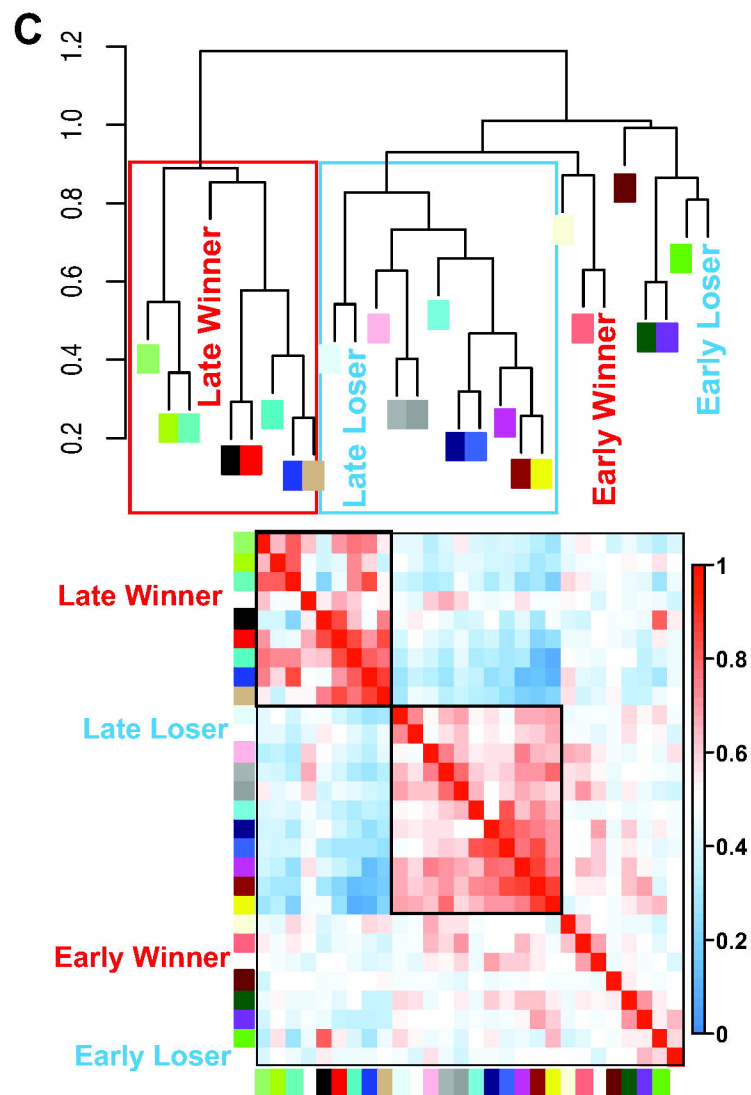

**A**

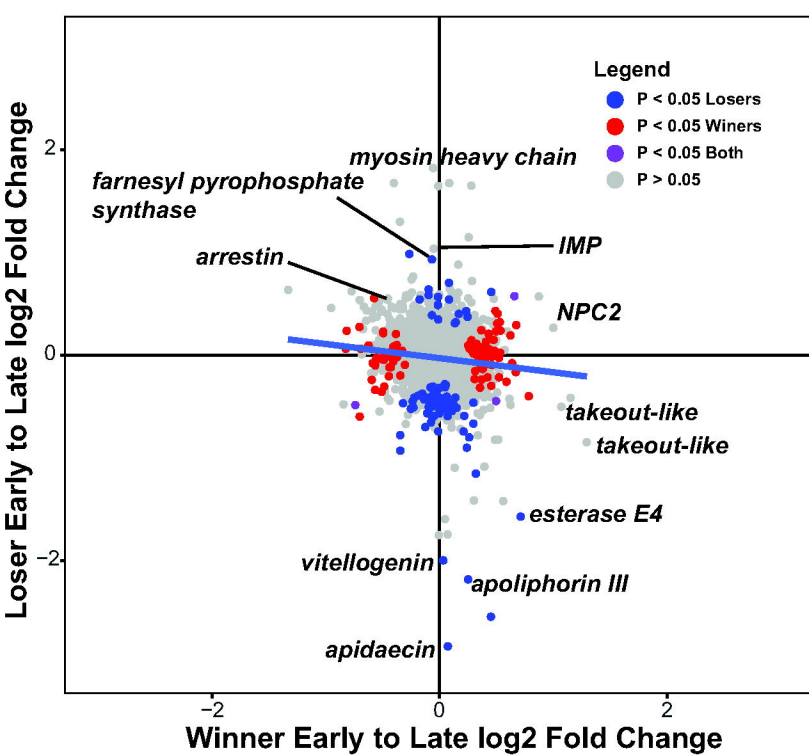

**B**

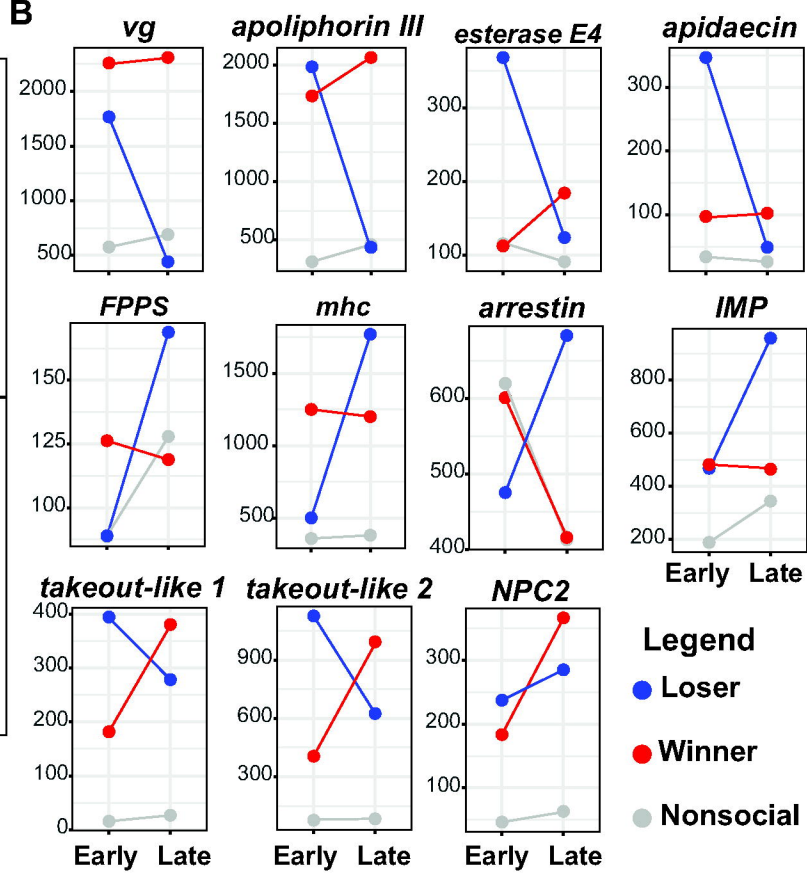

Source: https://biorxiv.org/content/10.1101/2021.03.01.433260v1.full.pdf
